# Supplementary material for: Findings from a novel approach to publication guideline revision: user road testing of a draft version of SQUIRE 2.0
Source: PubMed Central journal article supplement — BMJ Qual Saf. 2015 Aug 11;25(4):265–72. doi: 10.1136/bmjqs-2015-004117 (PMC4819644; doi:10.1136/bmjqs-2015-004117), 2015-08-11
Supplement: bmjqs-2015-004117-s2.pdf [file bmjqs-2015-004117-s2.pdf]

**Appendix Table 2.** The extent each item was included, as reported by road testing participants.

| <i>Did you include each of the following items from the SQUIRE 1.6 Guidelines in the section you submitted?</i>                                            | Item included<br>In full | Item included<br>In part | Item included<br>Not at all |
|------------------------------------------------------------------------------------------------------------------------------------------------------------|--------------------------|--------------------------|-----------------------------|
| Items                                                                                                                                                      | Freq. (%)                |                          |                             |
| <b>Introduction (n=13)</b>                                                                                                                                 |                          |                          |                             |
| Nature and severity of the local problem, and its context.                                                                                                 | 11 (84.6%)               | 2 (15.4%)                | 0 (0.0%)                    |
| Selective summary of current knowledge of the problem and prior studies relevant to the improvement.                                                       | 11 (84.6%)               | 2 (15.4%)                | 0 (0.0%)                    |
| Specific aim of the improvement and intent of this report.                                                                                                 | 13 (100.0%)              | 0 (0.0%)                 | 0 (0.0%)                    |
| <b>Methods (n=10)</b>                                                                                                                                      |                          |                          |                             |
| Context elements that influenced the improvement, and reasons these elements were considered important.                                                    | 5 (50.0%)                | 3 (30.0%)                | 2 (20.0%)                   |
| The logic on which the improvement was based, including the mechanism by which the improvement was expected to work.                                       | 8 (80.0%)                | 2 (20.0%)                | 0 (0.0%)                    |
| Description of the improvement, in sufficient detail that others can reproduce it.                                                                         | 10 (100.0%)              | 0 (0.0%)                 | 0 (0.0%)                    |
| Study design (e.g., qualitative, quasi-experimental, experimental, mixed methods, time series) chosen for assessing the implementation of the improvement. | 8 (80.0%)                | 0 (0.0%)                 | 2 (20.0%)                   |
| Process and outcome measures used for the improvement, including rationale for the choice of measures, their validity and reliability.                     | 6 (60.0%)                | 4 (40.0%)                | 0 (0.0%)                    |
| Assessment methods for context factors that contributed to the success, failure, efficiency, and cost of the improvement.                                  | 1 (10%)                  | 6 (60.0%)                | 3 (30.0%)                   |
| Methods employed to ensure completeness of data.                                                                                                           | 3 (30.0%)                | 4 (40.0%)                | 3 (30.0%)                   |
| Qualitative and quantitative (e.g., statistical process control) methods used to draw inferences from the data on efficacy and understand the variation.   | 8 (80.0%)                | 1 (10.0%)                | 1 (10.0%)                   |

| Results (n=15)                                                                                                              |            |           |           |
|-----------------------------------------------------------------------------------------------------------------------------|------------|-----------|-----------|
| Initial steps of the improvement and how it evolved over time ( <i>e.g.</i> , time-line diagram, flow chart, or table).     | 8 (53.3%)  | 5 (33.3%) | 2 (13.3%) |
| Process and clinical outcomes of the improvement.                                                                           | 12 (80.0%) | 3 (20.0%) | 0 (0.0%)  |
| Observed associations between outcomes, improvement, and relevant contextual factors.                                       | 12 (80.0%) | 3 (20.0%) | 0 (0.0%)  |
| Unintended consequences such as benefits, harms, unexpected results, problems, or failures associated with the improvement. | 8 (53.3%)  | 5 (33.3%) | 2 (13.3%) |
| Account for missing data and efforts to overcome data inadequacy                                                            | 8 (53.3%)  | 4 (26.7%) | 3 (20.0%) |
| Discussion (n=5)                                                                                                            |            |           |           |
| Key findings, including relevance to the study aim.                                                                         | 5 (100.0%) | 0 (0.0%)  | 0 (0.0%)  |
| Relation of the key findings to the original logic and the mechanisms by which the study was expected to work.              | 5 (100.0%) | 0 (0.0%)  | 0 (0.0%)  |
| Particular strengths of the work.                                                                                           | 5 (100.0%) | 0 (0.0%)  | 0 (0.0%)  |
| Strength of the relationship between the improvement and the outcomes.                                                      | 3 (60.0%)  | 1 (20.0%) | 1 (20.0%) |
| Clinical significance of the improvement.                                                                                   | 4 (80.0%)  | 0 (0.0%)  | 1 (20.0%) |
| Reasons for any differences between observed and expected outcomes, including contextual components.                        | 3 (60.0%)  | 1 (20.0%) | 1 (20.0%) |
| Comparison of study results with findings from other studies.                                                               | 3 (60.0%)  | 1 (20.0%) | 1 (20.0%) |
| Confounding, bias, or imprecision in the improvement's design, methods, measurement, or analysis.                           | 2 (40.0%)  | 2 (40.0%) | 1 (20.0%) |
| Limits to generalizability.                                                                                                 | 4 (80.0%)  | 1 (20.0%) | 0 (0.0%)  |
| Efforts made to minimize and adjust for the study's limitations.                                                            | 2 (40.0%)  | 2 (40.0%) | 1 (20.0%) |
| Overall utility of the improvement.                                                                                         | 3 (60.0%)  | 1 (20.0%) | 1 (20.0%) |
| Implications of this work for further studies of improvement.                                                               | 5 (100.0%) | 0 (0.0%)  | 0 (0.0%)  |
| Costs and strategic trade-offs, including opportunity costs.                                                                | 1 (20.0%)  | 0 (0.0%)  | 4 (80.0%) |
| Modifications of the improvements to advance future work                                                                    | 4 (80.0%)  | 1 (20.0%) | 0 (0.0%)  |
| Likely future course of the improvements observed.                                                                          | 4 (80.0%)  | 1 (20.0%) | 0 (0.0%)  |
